# Supplementary material for: Atrial natriuretic peptide promotes uterine decidualization and a TRAIL-dependent mechanism in spiral artery remodeling
Source: JCI journal article supplement (doi:10.1172/jci151053), 2021-09-02
Supplement: sd1 [file 1]

**Atrial natriuretic peptide promotes uterine decidualization and a TRAIL-dependent mechanism in spiral artery remodeling**

Supplemental Figures and Tables

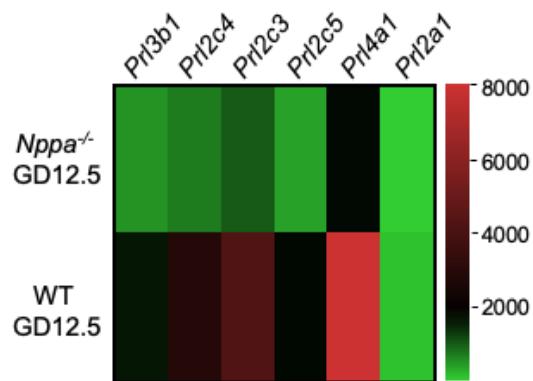

**Supplemental Figure 1.** Reduced expression of prolactin gene family members in uterine tissues from pregnant *Nppa*<sup>-/-</sup> mice. Total RNAs isolated from pregnant WT and *Nppa*<sup>-/-</sup> mouse uteruses were used for gene expression analysis using MouseRef-8 v2.0 BeadChip (Illumina, BD-202-0202). Expression levels of prolactin family genes were analyzed with the Illumina GenomeStudio software. A heat map is shown (right). Data are representative of two replicates.

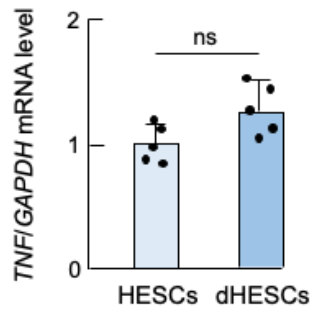

**Supplemental Figure 2.** *TNF* mRNA levels in HESCs and dHESCs. HESCs were cultured in non-differentiation or differentiation medium. mRNAs from HESCs and decidualized HESCs (dHESCs) were used for quantitative RT-PCR to examine *TNF* mRNA levels with *GAPDH* mRNA as a control. Data (mean  $\pm$  S.D.) from five experiments were analyzed by Student's *t* test. ns: not significant.

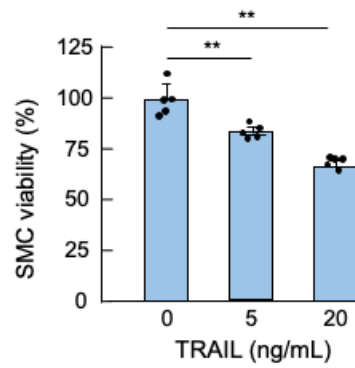

**Supplemental Figure 3.** TRAIL induces uterine SMC death. Human uterine SMCs were cultured with increasing concentrations of recombinant TRAIL. SMC viability was measured. Data (mean  $\pm$  S.D.) from five experiments were analyzed by one-way ANOVA. **\*\*** $P < 0.01$ .

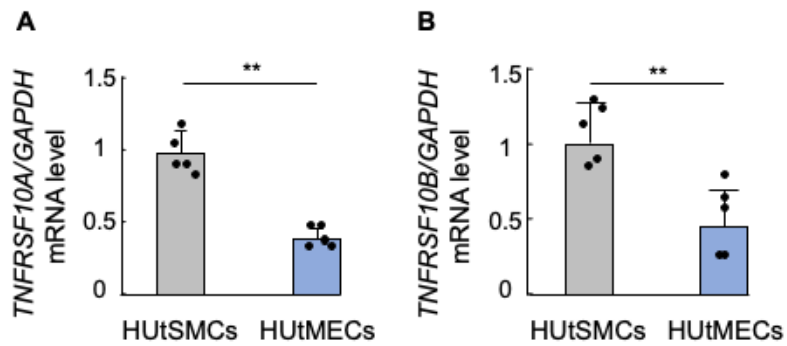

**Supplemental Figure 4.** *TNFRSF10A* and *TNFRSF10B* mRNA levels in human uterine SMCs and ECs. (**A** and **B**) mRNAs were isolated from human uterine SMCs (HUtSMCs) and microvascular ECs (HUtMECs) and used for quantitative RT-PCR to examine *TNFRSF10A* (**A**) and *TNFRSF10B* (**B**) mRNA levels with *GAPDH* mRNA as a control. Data (mean ± S.D.) from five experiments were analyzed by Student's *t* test. \*\**P* < 0.01.

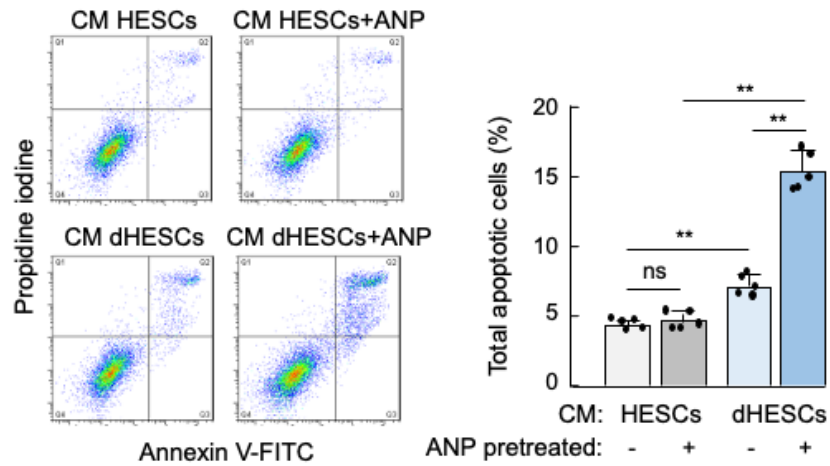

**Supplemental Figure 5.** Apoptosis in human uterine SMCs. Human uterine SMCs were incubated with CM from HESCs or dHESCs without (-) or with (+) recombinant ANP pretreatment. Apoptosis was analyzed by flow cytometry with an FITC-conjugated anti-annexin V antibody. Data (mean  $\pm$  S.D.) from five experiments were analyzed by one-way ANOVA. \*\* $P < 0.01$ . ns: not significant.

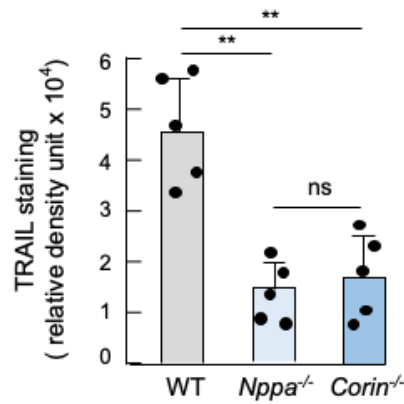

**Supplemental Figure 6.** Immunostaining of TRAIL in uteruses from pregnant mice. Uterine sections from pregnant (GD12.5) WT, *Nppa*<sup>-/-</sup> and *Corin*<sup>-/-</sup> mice were stained using an anti-TRAIL antibody. Stained sections were examined under a light microscope. Representative images are presented in Figure 6F. Relative TRAIL staining signals were quantified using ImageJ software. Data (mean  $\pm$  S.D.) from five experiments were analyzed by one-way ANOVA. \*\* $P$  < 0.01. ns: not significant.

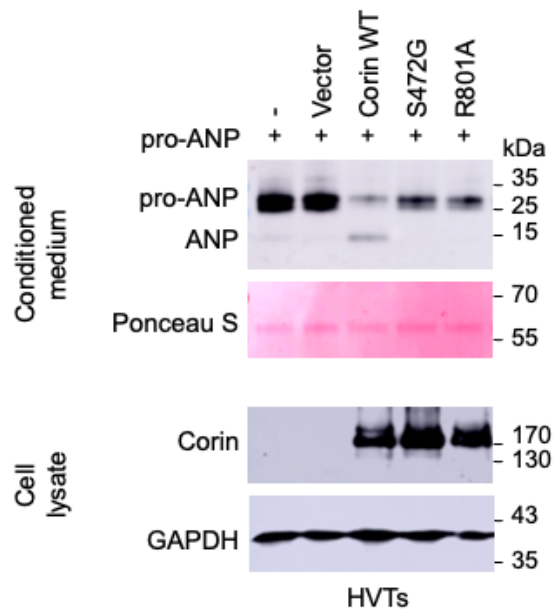

**Supplemental Figure 7.** Corin-mediated pro-ANP processing in human villus trophoblasts (HVTs). Plasmids expressing human pro-ANP and corin WT and mutants S472G (identified in preeclamptic women) and R801A (an inactive control) or a control vector were transfected in cultured HVTs. After 24 h at 37°C, the conditioned medium was collected. Pro-ANP and ANP fragments were analyzed by western blotting (top panel). A Ponceau S-stained non-specific band in the conditioned medium was used as a protein loading control (second panel). Corin proteins in the transfected HVTs were verified by western blotting with GAPDH as a control (bottom two panels). Data are representative of three experiments.

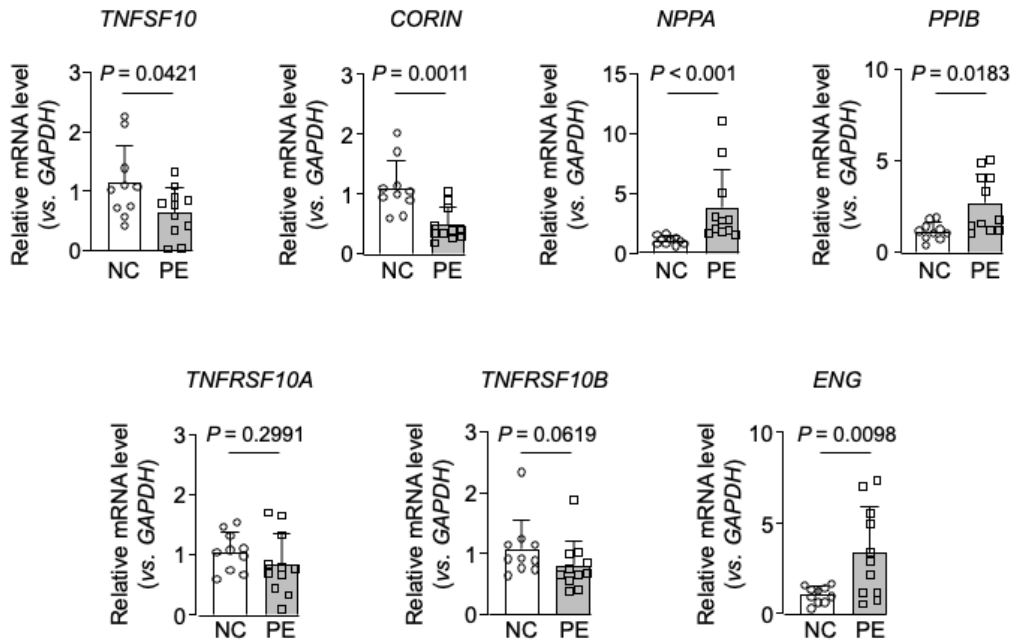

**Supplemental Figure 8.** Gene expression analysis in normal and preeclamptic placentas. Placental tissues from normal pregnant controls (NC) (n=10) and preeclamptic (PE) women (n=11) were used to isolate mRNAs. *TNFSF10* (encoding TRAIL), *CORIN*, *NPPA* (encoding pro-ANP), *PPIB* (encoding cyclophilin B), *TNFRSF10A* (encoding TRAIL receptor 1), *TNFRSF10B* (encoding TRAIL receptor 2), and *ENG* (encoding endoglin) mRNA levels were analyzed by quantitative RT-PCR. *GAPDH* mRNA levels were used to normalize the data. Statistical analysis was done with Student's *t* and Mann-Whitney tests.



**Supplemental Table 1. Antibodies used in this study**

| <b>Antibody</b>                                       | <b>Source</b>     | <b>Identifier</b> | <b>Dilution or concentration</b> |
|-------------------------------------------------------|-------------------|-------------------|----------------------------------|
| Caspase-3 (rabbit monoclonal)                         | Cell Signaling    | 14220             | 1:1000                           |
| Human FAS ligand (goat polyclonal)                    | R&D Systems       | AF126-SP          | 1:1000                           |
| Mouse Fas ligand (rat monoclonal)                     | R&D Systems       | MAB526-SP         | 1:1000                           |
| Human TRAIL (rabbit polyclonal)                       | R&D Systems       | AF375-SP          | 1:800                            |
| Mouse TRAIL (rabbit polyclonal)                       | LSBio             | LS-C331936-50     | 1:1000                           |
| Mouse TRAIL (goat polyclonal)                         | R&D Systems       | AF1121            | 1:150                            |
| Human TRAIL R1 (goat polyclonal)                      | R&D Systems       | AF347-SP          | 1:800                            |
| Human TRAIL R2 (goat polyclonal)                      | R&D Systems       | AF631-SP          | 1:800                            |
| Mouse TRAIL R (rat monoclonal)                        | R&D Systems       | MAB1540-SP        | 1:800                            |
| Cyclophilin B (mouse monoclonal)                      | R&D Systems       | MAB5410-SP        | 1:1000                           |
| Mouse Prolactin (goat polyclonal)                     | Thermo Fisher     | PA547140          | 1:500                            |
| Mouse IGFBP1 (rabbit polyclonal)                      | Thermo Fisher     | PA579447          | 1:1000                           |
| SMA (rabbit monoclonal)                               | Cell Signaling    | 19245T            | 1:200                            |
| vWF (rabbit polyclonal)                               | Thermo Fisher     | PA5-16634         | 1:100                            |
| Cytokeratin (mouse monoclonal)                        | Cell Signaling    | 4545S             | 1:100                            |
| Cleaved caspase-3 (rabbit polyclonal)                 | Cell Signaling    | 9661T             | 1:200                            |
| Cyclophilin B (mouse monoclonal)                      | Thermo Fisher     | MAB5410-SP        | 1:200                            |
| AP-anti-mouse secondary antibody (goat polyclonal)    | Thermo Fisher     | 31320             | 1:200                            |
| HRP-anti-rat secondary antibody (goat polyclonal)     | GenScript         | A00167            | 1:8000                           |
| HRP-anti-mouse secondary antibody (donkey polyclonal) | Fisher Scientific | OB641005          | 1:8000                           |
| HRP-anti-rabbit secondary antibody (goat polyclonal)  | Cell Signaling    | 7074S             | 1:1000                           |
| V5 (mouse monoclonal)                                 | Thermo Fisher     | R96025            | 1:1000                           |

---

|                                                                         |                   |         |         |
|-------------------------------------------------------------------------|-------------------|---------|---------|
| HRP-V5 (mouse monoclonal)                                               | Thermo Fisher     | R96125  | 1:5000  |
| HRP-anti-goat secondary antibody (donkey polyclonal)                    | Abcam             | Ab97110 | 1:5000  |
| Alexa Fluor 488-anti-rabbit secondary antibody (goat polyclonal)        | Thermo Fisher     | A-11008 | 1:1000  |
| Alexa Fluor 594-anti-mouse secondary antibody (donkey polyclonal)       | Thermo Fisher     | A-21203 | 1:1000  |
| Normal goat isotype control immunoglobulin Biotin (goat polyclonal)     | Fisher Scientific | BAF108  | 5 µg/mL |
| Normal rabbit isotype control immunoglobulin Biotin (rabbit polyclonal) | Fisher Scientific | AB105C  | 5 µg/mL |
| Normal mouse isotype control immunoglobulin Biotin (mouse polyclonal)   | Santa Cruz        | Sc-2025 | 5 µg/mL |
| p44/42 MAPK (ERK1/2) (rabbit monoclonal)                                | Cell Signaling    | 4695S   | 1:1000  |
| Phospho-p44/42 MAPK (ERK1/2) (Thr202/Tyr204) (rabbit polyclonal)        | Cell Signaling    | 9101S   | 1:1000  |

---

**Supplemental Table 2. Primers used in qRT-PCR**

| <b>Gene</b>                            | <b>Locus</b> | <b>Primer</b>      | <b>Sequence</b>                                   |
|----------------------------------------|--------------|--------------------|---------------------------------------------------|
| <i>CORIN</i>                           | NM_016869.3  | forward<br>reverse | CAAGTCTGAGGTCAACTGC<br>TGTCCACTTCTGCATTCCAC       |
| <i>ENG</i><br>(endoglin)               | NM_000118    | forward<br>reverse | CGGTGGTCAATATCCTGTGCGAG<br>AGGAAGTGTGGGCTGAGGTAGA |
| <i>FASLG</i><br>(FAS ligand)           | NM_000639.3  | forward<br>reverse | GCAGCCCTTCAATTACCCAT<br>CAGAGGTTGGACAGGGAAGAA     |
| <i>GAPDH</i>                           | NM_003842.5  | forward<br>reverse | GTCTCCTCTGACTTCAACAGCG<br>ACCACCCTGTTGCTGTAGCCAA  |
| <i>PPIB</i><br>(cyclophilin B)         | NM_000942    | forward<br>reverse | AACGCAGGCAAAGACACCAACG<br>TCTGTCTTGGTGCTCTCCACCT  |
| <i>TNF</i>                             | NM_000594.4  | forward<br>reverse | CCGAGGCAGTCAGATCATCTT<br>AGCTGCCCTCAGCTTGA        |
| <i>TNFRSF10A</i><br>(TRAIL receptor 1) | NM_003844.4  | forward<br>reverse | ACCTTCAAGTTTGTCGTCGTC<br>AACTCTCCCAAAGGGCTATGT    |
| <i>TNFRSF10B</i><br>(TRAIL receptor 2) | NM_003842.5  | forward<br>reverse | AAGACCCTTGTGCTCGTTGT<br>AGGTGGACACAATCCCTCTG      |
| <i>TNFSF10</i><br>(TRAIL)              | NM_003810.4  | forward<br>reverse | AGTCAAGTGGCAACTCCGTC<br>GAGCTGCTACTCTCTGAGGAC     |

**Supplemental Table 3. Characteristics of pregnant women**

| Characteristics          | NC (n=10)      | PE (n=11)      | <i>P</i> value |
|--------------------------|----------------|----------------|----------------|
| Age (y)                  | 29.1 ± 3.3     | 29.3 ± 6.3     | 0.847          |
| BMI (kg/m <sup>2</sup> ) | 26.6 ± 3.6     | 31.1 ± 6.5     | 0.046          |
| Smoking                  | 0              | 0              | 1              |
| Pre-existing diabetes    | 2              | 4              | 0.6351         |
| Parity                   | 1.1 ± 0.1      | 1.5 ± 0.2      | 0.0789         |
| Blood pressure           |                |                |                |
| Systolic (mmHg)          | 124.0 ± 8.5    | 149.0 ± 10.1   | <0.0001        |
| Diastolic (mmHg)         | 72.0 ± 10.4    | 99.0 ± 9.5     | <0.0001        |
| Proteinuria              | 0              | 6              | 0.0124         |
| Gestational age (w)      | 39.3 ± 0.9     | 36.5 ± 2.1     | 0.0018         |
| Abnormal Doppler         | 0              | 0              | 1              |
| Mode of delivery         |                |                |                |
| Vaginal                  | 10             | 1              | <0.0001        |
| Cesarean                 | 0              | 10             | <0.0001        |
| Fetal birth weight (g)   | 3433.3 ± 446.5 | 2860.0 ± 671.2 | 0.0256         |

BMI: body mass index; NC: normal pregnant control; PE: preeclampsia; y: year; w: week; g: gram. Mean ± SD for continuous variables and numbers for categorical variables are presented. *P* values between NC and PE groups were analyzed by Student's *t* test for continuous data or Fisher's exact test for categorical data.
